# Supplementary material for: Transcriptional profiling reveals developmental relationship and distinct biological functions of CD16+ and CD16- monocyte subsets
Source: PubMed Central journal article supplement (PMC2741492; doi:10.1186/1471-2164-10-403), 2009-08-27
Supplement: 1471-2164-10-403-S1.pdf [file 1471-2164-10-403-S1.pdf]

**Supplemental Table 1 - Genes upregulated in CD16+ monocytes**

**Known genes (n=153)**

| <b>GeneSymbol</b> | <b>ratio</b> | <b>p-value</b> | <b>ProbeSetN</b> | <b>ProbeSetID</b> | <b>GeneTitle</b>                                                       |
|-------------------|--------------|----------------|------------------|-------------------|------------------------------------------------------------------------|
| FCGR3A            | 20,1         | 0,000          | 3595             | 204006_s_at       | Fc fragment of IgG, low affinity IIIa, receptor for (CD16)             |
| CDKN1C            | 18,4         | 0,000          | 12791            | 213348_at         | cyclin-dependent kinase inhibitor 1C (p57, Kip2)                       |
| MGC19531          | 6,7          | 0,000          | 475              | 200885_at         | hypothetical protein MGC19531                                          |
| CUTL1             | 5,8          | 0,000          | 1957             | 202367_at         | cut-like 1, CCAAT displacement protein (Drosophila)                    |
| MTSS1             | 5,7          | 0,000          | 2628             | 203037_s_at       | metastasis suppressor 1                                                |
| EAT2              | 5,7          | 0,000          | 45441            | 1553177_at        | SH2 domain-containing molecule EAT2                                    |
| MS4A4A            | 5,5          | 0,000          | 19033            | 219607_s_at       | membrane-spanning 4-domains, subfamily A, member 4                     |
| CHST2             | 5,4          | 0,000          | 3510             | 203921_at         | carbohydrate (N-acetylglucosamine-6-O) sulfotransferase 2              |
| CYFIP2            | 5,3          | 0,000          | 15220            | 215785_s_at       | cytoplasmic FMR1 interacting protein 2                                 |
| TCF7L2            | 5,1          | 0,000          | 12209            | 212762_s_at       | transcription factor 7-like 2 (T-cell specific, HMG-box)               |
| PTP4A3            | 5,0          | 0,000          | 9245             | 209695_at         | protein tyrosine phosphatase type IVA, member 3                        |
| INSIG1            | 5,0          | 0,000          | 1215             | 201625_s_at       | insulin induced gene 1                                                 |
| SIGLEC10          | 4,8          | 0,000          | 45167            | 1552807_a_at      | sialic acid binding Ig-like lectin 10                                  |
| IFITM1            | 4,5          | 0,026          | 13463            | 214022_s_at       | interferon induced transmembrane protein 1 (9-27)                      |
| SFMBT2            | 4,4          | 0,000          | 27079            | 227210_at         | Scm-like with four mbt domains 2                                       |
| SGPP1             | 4,2          | 0,000          | 20693            | 221268_s_at       | sphingosine-1-phosphate phosphatase 1                                  |
| MS4A7             | 4,1          | 0,000          | 23235            | 223344_s_at       | membrane-spanning 4-domains, subfamily A, member 7                     |
| CTSL              | 4,0          | 0,000          | 1677             | 202087_s_at       | cathepsin L                                                            |
| EVL               | 3,7          | 0,000          | 17265            | 217838_s_at       | Enah/Vasp-like                                                         |
| TAGLN             | 3,7          | 0,000          | 5136             | 205547_s_at       | transgelin                                                             |
| RUNX3             | 3,7          | 0,000          | 3787             | 204198_s_at       | runt-related transcription factor 3                                    |
| SAMSN1            | 3,6          | 0,000          | 54073            | 1569599_at        | SAM domain, SH3 domain and nuclear localisation signals, 1             |
| TM7SF1            | 3,6          | 0,000          | 3726             | 204137_at         | transmembrane 7 superfamily member 1 (upregulated in kidney)           |
| HMOX1             | 3,5          | 0,000          | 3254             | 203665_at         | heme oxygenase (decycling) 1                                           |
| DUSP5             | 3,5          | 0,000          | 9012             | 209457_at         | dual specificity phosphatase 5                                         |
| ADA               | 3,5          | 0,000          | 4228             | 204639_at         | adenosine deaminase                                                    |
| EMR2              | 3,5          | 0,000          | 7193             | 207610_s_at       | egf-like module containing, mucin-like, hormone receptor-like 2        |
| SES1              | 3,4          | 0,000          | 1052             | 201462_at         | secernin 1                                                             |
| EMR1              | 3,4          | 0,000          | 6699             | 207111_at         | egf-like module containing, mucin-like, hormone receptor-like 1        |
| PAG               | 3,3          | 0,000          | 25497            | 225626_at         | phosphoprotein associated with glycosphingolipid-enriched microdomains |
| CTL2              | 3,3          | 0,000          | 24482            | 224609_at         | CTL2 gene                                                              |
| RRAS              | 3,3          | 0,000          | 12094            | 212647_at         | related RAS viral (r-ras) oncogene homolog                             |
| PHTF2             | 3,2          | 0,000          | 9330             | 209780_at         | putative homeodomain transcription factor 2                            |
| LTB               | 3,2          | 0,000          | 6925             | 207339_s_at       | lymphotoxin beta (TNF superfamily, member 3)                           |
| FLJ14299          | 3,2          | 0,025          | 22653            | 222760_at         | hypothetical protein FLJ14299                                          |
| C20orf55          | 3,2          | 0,000          | 26454            | 226584_s_at       | chromosome 20 open reading frame 55                                    |
| MLP               | 3,2          | 0,000          | 234              | 200644_at         | MARCKS-like protein                                                    |
| PAPSS2            | 3,2          | 0,000          | 2651             | 203060_s_at       | 3'-phosphoadenosine 5'-phosphosulfate synthase 2                       |

|              |     |       |       |             |                                                                           |
|--------------|-----|-------|-------|-------------|---------------------------------------------------------------------------|
| LIMD1        | 3,2 | 0,000 | 22655 | 222762_x_at | LIM domains containing 1                                                  |
| NAP1L1       | 3,1 | 0,000 | 13306 | 213864_s_at | nucleosome assembly protein 1-like 1                                      |
| PLAGL2       | 3,0 | 0,000 | 2516  | 202925_s_at | pleiomorphic adenoma gene-like 2                                          |
| SH2D3C       | 2,9 | 0,000 | 26542 | 226673_at   | SH2 domain containing 3C                                                  |
| TNFRSF8      | 2,9 | 0,000 | 6317  | 206729_at   | tumor necrosis factor receptor superfamily, member 8                      |
| PTGER4       | 2,9 | 0,000 | 4486  | 204897_at   | prostaglandin E receptor 4 (subtype EP4)                                  |
| MDM1         | 2,9 | 0,000 | 13203 | 213761_at   | nuclear protein double minute 1                                           |
| PIK3CG       | 2,8 | 0,000 | 5958  | 206370_at   | phosphoinositide-3-kinase, catalytic, gamma polypeptide                   |
| SNX9         | 2,8 | 0,000 | 22920 | 223027_at   | sorting nexin 9                                                           |
| SPRED1       | 2,8 | 0,019 | 26706 | 226837_at   | sprouty-related, EVH1 domain containing 1                                 |
| CSF1R        | 2,8 | 0,000 | 2695  | 203104_at   | colony stimulating factor 1 receptor                                      |
| SNFT         | 2,8 | 0,000 | 19784 | 220358_at   | Jun dimerization protein p21SNFT                                          |
| COTL1        | 2,8 | 0,000 | 47743 | 1556346_at  | coactosin-like 1 (Dictyostelium)                                          |
| CHST7        | 2,8 | 0,000 | 6344  | 206756_at   | carbohydrate (N-acetylglucosamine 6-O) sulfotransferase 7                 |
| CD79B        | 2,8 | 0,000 | 4886  | 205297_s_at | CD79B antigen (immunoglobulin-associated beta)                            |
| FER1L3       | 2,8 | 0,022 | 11315 | 211864_s_at | fer-1-like 3, myoferlin (C. elegans)                                      |
| DKFZP727G051 | 2,8 | 0,000 | 27080 | 227211_at   | DKFZP727G051 protein                                                      |
| JFC1         | 2,7 | 0,000 | 27003 | 227134_at   | NADPH oxidase-related, C2 domain-containing protein                       |
| CLN6         | 2,7 | 0,022 | 22223 | 64408_s_at  | ceroid-lipofuscinosis, neuronal 6, late infantile, variant                |
| SLC2A6       | 2,7 | 0,000 | 19517 | 220091_at   | solute carrier family 2 (facilitated glucose transporter), member 6       |
| UTRN         | 2,7 | 0,000 | 24964 | 225093_at   | utrophin (homologous to dystrophin)                                       |
| FMNL2        | 2,6 | 0,000 | 26054 | 226184_at   | formin-like 2                                                             |
| KIAA1959     | 2,6 | 0,000 | 38325 | 238462_at   | nm23-phosphorylated unknown substrate                                     |
| ICAM2        | 2,6 | 0,000 | 13062 | 213620_s_at | intercellular adhesion molecule 2                                         |
| TBC1D8       | 2,6 | 0,000 | 4115  | 204526_s_at | TBC1 domain family, member 8 (with GRAM domain)                           |
| RTN2         | 2,6 | 0,000 | 21869 | 34408_at    | reticulon 2                                                               |
| MERTK        | 2,6 | 0,000 | 5617  | 206028_s_at | c-mer proto-oncogene tyrosine kinase                                      |
| SPN          | 2,5 | 0,000 | 5645  | 206057_x_at | sialophorin (gpL115, leukosialin, CD43)                                   |
| MAFB         | 2,5 | 0,000 | 22563 | 222670_s_at | v-maf musculoaponeurotic fibrosarcoma oncogene homolog B (avian)          |
| GUCY1B3      | 2,5 | 0,000 | 3406  | 203817_at   | guanylate cyclase 1, soluble, beta 3                                      |
| DRCTNNB1A    | 2,5 | 0,000 | 27108 | 227239_at   | down-regulated by Ctnnb1, a                                               |
| IFITM2       | 2,5 | 0,000 | 905   | 201315_x_at | interferon induced transmembrane protein 2 (1-8D)                         |
| E2IG5        | 2,5 | 0,000 | 24226 | 224345_x_at | growth and transformation-dependent protein                               |
| P2RX1        | 2,5 | 0,000 | 9941  | 210401_at   | purinergic receptor P2X, ligand-gated ion channel, 1                      |
| SOD1         | 2,5 | 0,000 | 232   | 200642_at   | superoxide dismutase 1, soluble (amyotrophic lateral sclerosis 1 (adult)) |
| IFITM3       | 2,5 | 0,022 | 11651 | 212203_x_at | interferon induced transmembrane protein 3 (1-8U)                         |
| MGC16202     | 2,5 | 0,000 | 26196 | 226326_at   | hypothetical protein MGC16202                                             |
| LST1         | 2,5 | 0,000 | 14014 | 214574_x_at | leukocyte specific transcript 1                                           |
| AIG1         | 2,5 | 0,000 | 23028 | 223136_at   | androgen-induced 1                                                        |
| C3AR1        | 2,4 | 0,019 | 9454  | 209906_at   | complement component 3a receptor 1                                        |
| FLJ00332     | 2,4 | 0,000 | 28126 | 228258_at   | FLJ00332 protein                                                          |
| LOC122618    | 2,4 | 0,000 | 35665 | 235802_at   | hypothetical protein BC015003                                             |

|          |     |       |       |             |                                                                                          |
|----------|-----|-------|-------|-------------|------------------------------------------------------------------------------------------|
| CTSC     | 2,4 | 0,000 | 25517 | 225646_at   | cathepsin C                                                                              |
| GBP4     | 2,4 | 0,049 | 35038 | 235175_at   | guanylate binding protein 4                                                              |
| CX3CR1   | 2,4 | 0,041 | 5487  | 205898_at   | chemokine (C-X3-C motif) receptor 1                                                      |
| LILRB1   | 2,4 | 0,000 | 29805 | 229937_x_at | leukocyte immunoglobulin-like receptor, subfamily B (with TM and ITIM domains), member 1 |
| ITGAL    | 2,4 | 0,000 | 12918 | 213475_s_at | integrin, alpha L (antigen CD11A (p180))                                                 |
| PSCDBP   | 2,3 | 0,000 | 9158  | 209606_at   | pleckstrin homology, Sec7 and coiled-coil domains, binding protein                       |
| SLAMF7   | 2,3 | 0,000 | 22731 | 222838_at   | SLAM family member 7                                                                     |
| KIAA1039 | 2,3 | 0,000 | 12723 | 213280_at   | KIAA1039 protein                                                                         |
| CDC42EP4 | 2,3 | 0,000 | 14159 | 214721_x_at | CDC42 effector protein (Rho GTPase binding) 4                                            |
| LYN      | 2,3 | 0,000 | 2216  | 202626_s_at | v-yes-1 Yamaguchi sarcoma viral related oncogene homolog                                 |
| HSPH1    | 2,3 | 0,048 | 6564  | 206976_s_at | heat shock 105kDa/110kDa protein 1                                                       |
| GNG2     | 2,3 | 0,000 | 24836 | 224964_s_at | guanine nucleotide binding protein (G protein), gamma 2                                  |
| HT021    | 2,3 | 0,000 | 18714 | 219288_at   | HT021                                                                                    |
| MAP4     | 2,3 | 0,000 | 21806 | 243_g_at    | microtubule-associated protein 4                                                         |
| C6orf187 | 2,3 | 0,022 | 29258 | 229390_at   | chromosome 6 open reading frame 187                                                      |
| ULK2     | 2,3 | 0,000 | 3651  | 204062_s_at | unc-51-like kinase 2 (C. elegans)                                                        |
| ABHD6    | 2,3 | 0,000 | 22074 | 45288_at    | abhydrolase domain containing 6                                                          |
| HHL      | 2,3 | 0,000 | 14778 | 215342_s_at | expressed in hematopoietic cells, heart, liver                                           |
| ETS1     | 2,3 | 0,000 | 24705 | 224833_at   | v-ets erythroblastosis virus E26 oncogene homolog 1 (avian)                              |
| CXCL16   | 2,3 | 0,000 | 23345 | 223454_at   | chemokine (C-X-C motif) ligand 16                                                        |
| KLF2     | 2,3 | 0,000 | 18797 | 219371_s_at | Kruppel-like factor 2 (lung)                                                             |
| DUSP7    | 2,3 | 0,000 | 13290 | 213848_at   | dual specificity phosphatase 7                                                           |
| WARS     | 2,3 | 0,000 | 219   | 200629_at   | tryptophanyl-tRNA synthetase                                                             |
| CD47     | 2,3 | 0,000 | 25886 | 226016_at   | CD47 antigen (Rh-related antigen, integrin-associated signal transducer)                 |
| RARA     | 2,3 | 0,000 | 3338  | 203749_s_at | retinoic acid receptor, alpha                                                            |
| UNC93B1  | 2,3 | 0,000 | 20424 | 220998_s_at | unc-93 homolog B1 (C. elegans) /// unc-93 homolog B1 (C. elegans)                        |
| RASGRP2  | 2,3 | 0,000 | 7773  | 208206_s_at | RAS guanyl releasing protein 2 (calcium and DAG-regulated)                               |
| GCH1     | 2,2 | 0,022 | 3813  | 204224_s_at | GTP cyclohydrolase 1 (dopa-responsive dystonia)                                          |
| MADH1    | 2,2 | 0,000 | 27666 | 227798_at   | MAD, mothers against decapentaplegic homolog 1 (Drosophila)                              |
| REPS1    | 2,2 | 0,000 | 24246 | 224366_s_at | RALBP1 associated Eps domain containing 1                                                |
| AP2A1    | 2,2 | 0,000 | 33932 | 234068_s_at | adaptor-related protein complex 2, alpha 1 subunit                                       |
| IL12RB1  | 2,2 | 0,000 | 44992 | 1552584_at  | interleukin 12 receptor, beta 1                                                          |
| LFNG     | 2,2 | 0,000 | 28630 | 228762_at   | lunatic fringe homolog (Drosophila)                                                      |
| SWAP70   | 2,2 | 0,000 | 8863  | 209307_at   | SWAP-70 protein                                                                          |
| DRAP1    | 2,2 | 0,000 | 2847  | 203258_at   | DR1-associated protein 1 (negative cofactor 2 alpha)                                     |
| WDR11    | 2,2 | 0,000 | 17517 | 218090_s_at | WD repeat domain 11                                                                      |
| ARRB1    | 2,2 | 0,000 | 18258 | 218832_x_at | arrestin, beta 1                                                                         |
| SLC1A4   | 2,2 | 0,000 | 12258 | 212811_x_at | solute carrier family 1 (glutamate/neutral amino acid transporter), member 4             |
| CD97     | 2,2 | 0,000 | 2501  | 202910_s_at | CD97 antigen                                                                             |
| GRCC10   | 2,2 | 0,000 | 24592 | 224719_s_at | likely ortholog of mouse gene rich cluster, C10 gene                                     |
| RAFTLIN  | 2,2 | 0,000 | 12093 | 212646_at   | raft-linking protein                                                                     |
| SVIL     | 2,2 | 0,000 | 2155  | 202565_s_at | supervillin                                                                              |

|              |     |       |       |             |                                                                                            |
|--------------|-----|-------|-------|-------------|--------------------------------------------------------------------------------------------|
| MGLL         | 2,2 | 0,000 | 10534 | 211026_s_at | monoglyceride lipase /// monoglyceride lipase                                              |
| ARHF         | 2,2 | 0,000 | 18471 | 219045_at   | ras homolog gene family, member F (in filopodia)                                           |
| NELF         | 2,2 | 0,000 | 20639 | 221214_s_at | nasal embryonic luteinizing hormone-releasing hormone factor                               |
| PIK3AP1      | 2,1 | 0,000 | 26329 | 226459_at   | phosphoinositide-3-kinase adaptor protein 1                                                |
| MAIL         | 2,1 | 0,000 | 23109 | 223217_s_at | molecule possessing ankyrin repeats induced by lipopolysaccharide (MAIL), homolog of mouse |
| CKS1B        | 2,1 | 0,000 | 1487  | 201897_s_at | CDC28 protein kinase regulatory subunit 1B                                                 |
| CENTD1       | 2,1 | 0,000 | 13060 | 213618_at   | centaurin, delta 1                                                                         |
| POU2F2       | 2,1 | 0,041 | 28211 | 228343_at   | POU domain, class 2, transcription factor 2                                                |
| TRIM14       | 2,1 | 0,022 | 2738  | 203148_s_at | tripartite motif-containing 14                                                             |
| VIL2         | 2,1 | 0,022 | 8182  | 208623_s_at | villin 2 (ezrin)                                                                           |
| PECAM1       | 2,1 | 0,000 | 8539  | 208983_s_at | platelet/endothelial cell adhesion molecule (CD31 antigen)                                 |
| BCL2A1       | 2,1 | 0,022 | 5270  | 205681_at   | BCL2-related protein A1                                                                    |
| NFATC1       | 2,1 | 0,000 | 9708  | 210162_s_at | nuclear factor of activated T-cells, cytoplasmic, calcineurin-dependent 1                  |
| RAPH1        | 2,1 | 0,029 | 25059 | 225188_at   | Ras association (RalGDS/AF-6) and pleckstrin homology domains 1                            |
| MCOLN1       | 2,1 | 0,000 | 19378 | 219952_s_at | mucolipin 1                                                                                |
| PEX7         | 2,1 | 0,000 | 5009  | 205420_at   | peroxisomal biogenesis factor 7                                                            |
| LIM          | 2,1 | 0,000 | 16236 | 216804_s_at | LIM protein (similar to rat protein kinase C-binding enigma)                               |
| P114-RHO-GEF | 2,1 | 0,000 | 12484 | 213039_at   | Rho-specific guanine nucleotide exchange factor p114                                       |
| FLJ11029     | 2,1 | 0,000 | 28141 | 228273_at   | hypothetical protein FLJ11029                                                              |
| RYBP         | 2,1 | 0,022 | 1435  | 201845_s_at | RING1 and YY1 binding protein                                                              |
| FLJ21069     | 2,1 | 0,000 | 26295 | 226425_at   | hypothetical protein FLJ21069                                                              |
| VDR          | 2,0 | 0,000 | 3844  | 204255_s_at | vitamin D (1,25- dihydroxyvitamin D3) receptor                                             |
| NEURL        | 2,0 | 0,000 | 4477  | 204888_s_at | neuralized-like (Drosophila)                                                               |
| ZBTB4        | 2,0 | 0,000 | 25500 | 225629_s_at | zinc finger and BTB domain containing 4                                                    |
| UBE2J1       | 2,0 | 0,000 | 17251 | 217824_at   | ubiquitin-conjugating enzyme E2, J1 (UBC6 homolog, yeast)                                  |
| GPR155       | 2,0 | 0,000 | 31034 | 231166_at   | G protein-coupled receptor 154                                                             |
| SH3MD2       | 2,0 | 0,000 | 25460 | 225589_at   | SH3 multiple domains 2                                                                     |
| LOC339903    | 2,0 | 0,038 | 28589 | 228721_at   | hypothetical protein LOC339903                                                             |
| TMPO         | 2,0 | 0,022 | 24816 | 224944_at   | thymopoietin                                                                               |
| ZRANB1       | 2,0 | 0,022 | 41999 | 242136_x_at | zinc finger, RAN-binding domain containing 1                                               |
| NESH         | 2,0 | 0,000 | 23505 | 223615_at   | NESH protein                                                                               |

#### **Unknown transcribed sequences (n=19)**

| <b>GeneSymbol</b> | <b>ratio</b> | <b>p-value</b> | <b>ProbeSetN</b> | <b>ProbeSetID</b> | <b>GeneTitle</b>                                    |
|-------------------|--------------|----------------|------------------|-------------------|-----------------------------------------------------|
| ---               | 7,4          | 0,000          | 16326            | 216894_x_at       | ---                                                 |
| ---               | 5,4          | 0,000          | 15944            | 216511_s_at       | ---                                                 |
| ---               | 3,1          | 0,022          | 15997            | 216565_x_at       | ---                                                 |
| ---               | 3,0          | 0,000          | 39157            | 239294_at         | Homo sapiens transcribed sequences                  |
| ---               | 2,8          | 0,000          | 48998            | 1558397_at        | Homo sapiens cDNA FLJ34100 fis, clone FCBBF3007597. |
| ---               | 2,7          | 0,000          | 13167            | 213725_x_at       | Homo sapiens, clone IMAGE:4791553, mRNA             |
| ---               | 2,6          | 0,000          | 27730            | 227862_at         | Homo sapiens LOC374963 (LOC374963), mRNA            |

|     |     |       |       |              |                                                                           |
|-----|-----|-------|-------|--------------|---------------------------------------------------------------------------|
| --- | 2,5 | 0,000 | 43810 | 243947_s_at  | Homo sapiens transcribed sequences                                        |
| --- | 2,5 | 0,000 | 24973 | 225102_at    | Homo sapiens cDNA clone IMAGE:4441572, partial cds                        |
| --- | 2,3 | 0,000 | 29374 | 229506_at    | Homo sapiens cDNA FLJ30761 fis, clone FEBRA2000538.                       |
| --- | 2,3 | 0,000 | 27159 | 227290_at    | Homo sapiens cDNA FLJ13598 fis, clone PLACE1009921.                       |
| --- | 2,2 | 0,000 | 28312 | 228444_at    | Homo sapiens mRNA; cDNA DKFZp762M127 (from clone DKFZp762M127)            |
| --- | 2,2 | 0,049 | 32049 | 232181_at    | Homo sapiens mRNA; cDNA DKFZp686C1790 (from clone DKFZp686C1790)          |
| --- | 2,1 | 0,000 | 27976 | 228108_at    | Homo sapiens cDNA FLJ30761 fis, clone FEBRA2000538.                       |
| --- | 2,1 | 0,000 | 22805 | 222912_at    | Homo sapiens mRNA; cDNA DKFZp762M127 (from clone DKFZp762M127)            |
| --- | 2,1 | 0,000 | 49499 | 1559263_s_at | Homo sapiens similar to hypothetical protein D730019B10 (LOC340152), mRNA |
| --- | 2,1 | 0,000 | 48005 | 1556747_a_at | Homo sapiens cDNA FLJ39784 fis, clone SPLEN2002314.                       |
| --- | 2,0 | 0,039 | 52748 | 1565743_at   | Homo sapiens, clone IMAGE:4418644, mRNA                                   |
| --- | 2,0 | 0,048 | 36061 | 236198_at    | Homo sapiens transcribed sequences                                        |
