# Supplementary material for: Transcriptional profiling reveals developmental relationship and distinct biological functions of CD16+ and CD16- monocyte subsets
Source: PubMed Central journal article supplement (PMC2741492; doi:10.1186/1471-2164-10-403), 2009-08-27
Supplement: 1471-2164-10-403-S2.pdf [file 1471-2164-10-403-S2.pdf]

**Supplemental Table 2 - Genes downregulated in CD16+ monocytes**

**Known genes (n=166)**

| <b>GeneSymbol</b> | <b>ratio</b> | <b>p-value</b> | <b>ProbeSetN</b> | <b>ProbeSetID</b> | <b>GeneTitle</b>                                                                         |
|-------------------|--------------|----------------|------------------|-------------------|------------------------------------------------------------------------------------------|
| S100A12           | 0,12         | 0,000          | 5452             | 205863_at         | S100 calcium binding protein A12 (calgranulin C)                                         |
| CSPG2             | 0,13         | 0,000          | 11038            | 211571_s_at       | chondroitin sulfate proteoglycan 2 (versican)                                            |
| CD163             | 0,17         | 0,000          | 3234             | 203645_s_at       | CD163 antigen                                                                            |
| MGC71745          | 0,17         | 0,000          | 26658            | 226789_at         | similar to embigin                                                                       |
| CD14              | 0,17         | 0,000          | 1333             | 201743_at         | CD14 antigen                                                                             |
| QPCT              | 0,18         | 0,000          | 4763             | 205174_s_at       | glutaminy-peptide cyclotransferase (glutaminy cyclase)                                   |
| LOC199675         | 0,18         | 0,000          | 35431            | 235568_at         | hypothetical protein LOC199675                                                           |
| DKFZP434B044      | 0,19         | 0,000          | 20966            | 221541_at         | hypothetical protein DKFZp434B044                                                        |
| SLC2A3            | 0,20         | 0,000          | 2089             | 202499_s_at       | solute carrier family 2 (facilitated glucose transporter), member 3                      |
| CLECSF8           | 0,20         | 0,000          | 45141            | 1552773_at        | C-type (calcium dependent, carbohydrate-recognition domain) lectin, superfamily member 8 |
| MGST1             | 0,20         | 0,000          | 52606            | 1565162_s_at      | microsomal glutathione S-transferase 1                                                   |
| CCR2              | 0,20         | 0,000          | 6566             | 206978_at         | chemokine (C-C motif) receptor 2                                                         |
| RNASE2            | 0,21         | 0,000          | 5699             | 206111_at         | ribonuclease, RNase A family, 2 (liver, eosinophil-derived neurotoxin)                   |
| PLA2G7            | 0,21         | 0,000          | 5802             | 206214_at         | phospholipase A2, group VII (platelet-activating factor acetylhydrolase, plasma)         |
| SLC2A14           | 0,21         | 0,000          | 21510            | 222088_s_at       | solute carrier family 2 (facilitated glucose transporter), member 14                     |
| F13A1             | 0,21         | 0,000          | 2894             | 203305_at         | coagulation factor XIII, A1 polypeptide                                                  |
| CD36              | 0,22         | 0,000          | 9109             | 209555_s_at       | CD36 antigen (collagen type I receptor, thrombospondin receptor)                         |
| IER3              | 0,23         | 0,000          | 1221             | 201631_s_at       | immediate early response 3                                                               |
| GPR27             | 0,23         | 0,000          | 27637            | 227769_at         | G protein-coupled receptor 27                                                            |
| VNN2              | 0,24         | 0,000          | 5511             | 205922_at         | vanin 2                                                                                  |
| THBS1             | 0,24         | 0,000          | 700              | 201110_s_at       | thrombospondin 1                                                                         |
| CD99              | 0,24         | 0,000          | 619              | 201029_s_at       | CD99 antigen                                                                             |
| CYP1B1            | 0,25         | 0,000          | 2027             | 202437_s_at       | cytochrome P450, family 1, subfamily B, polypeptide 1                                    |
| SLC40A1           | 0,25         | 0,000          | 22937            | 223044_at         | solute carrier family 40 (iron-regulated transporter), member 1                          |
| FLJ31978          | 0,25         | 0,000          | 29638            | 229770_at         | hypothetical protein FLJ31978                                                            |
| CLECSF9           | 0,25         | 0,000          | 22827            | 222934_s_at       | C-type (calcium dependent, carbohydrate-recognition domain) lectin, superfamily member 9 |
| IL13RA1           | 0,25         | 0,000          | 10413            | 210904_s_at       | interleukin 13 receptor, alpha 1                                                         |
| ALDH1A1           | 0,25         | 0,000          | 11672            | 212224_at         | aldehyde dehydrogenase 1 family, member A1                                               |
| DREV1             | 0,26         | 0,000          | 17295            | 217868_s_at       | DORA reverse strand protein 1                                                            |
| TREM1             | 0,26         | 0,000          | 18860            | 219434_at         | triggering receptor expressed on myeloid cells 1                                         |
| MS4A6A            | 0,26         | 0,000          | 24236            | 224356_x_at       | membrane-spanning 4-domains, subfamily A, member 6A                                      |
| CSF3R             | 0,26         | 0,000          | 45531            | 1553297_a_at      | colony stimulating factor 3 receptor (granulocyte)                                       |
| F5                | 0,27         | 0,000          | 4303             | 204714_s_at       | coagulation factor V (proaccelerin, labile factor)                                       |
| ACTN1             | 0,27         | 0,000          | 8195             | 208636_at         | actinin, alpha 1                                                                         |
| ALOX5AP           | 0,28         | 0,000          | 3763             | 204174_at         | arachidonate 5-lipoxygenase-activating protein                                           |
| CRTAP             | 0,28         | 0,000          | 46400            | 1554464_a_at      | cartilage associated protein                                                             |
| GM2A              | 0,28         | 0,000          | 12184            | 212737_at         | GM2 ganglioside activator protein                                                        |
| SMA3              | 0,29         | 0,000          | 6153             | 206565_x_at       | SMA3                                                                                     |

|              |      |       |       |             |                                                                                   |
|--------------|------|-------|-------|-------------|-----------------------------------------------------------------------------------|
| TFEC         | 0,29 | 0,000 | 6303  | 206715_at   | transcription factor EC                                                           |
| FLJ22662     | 0,29 | 0,000 | 17881 | 218454_at   | hypothetical protein FLJ22662                                                     |
| EREG         | 0,29 | 0,000 | 5356  | 205767_at   | epiregulin                                                                        |
| CAPG         | 0,30 | 0,000 | 1440  | 201850_at   | capping protein (actin filament), gelsolin-like                                   |
| BST1         | 0,30 | 0,000 | 5304  | 205715_at   | bone marrow stromal cell antigen 1                                                |
| FLJ21308     | 0,30 | 0,000 | 18459 | 219033_at   | hypothetical protein FLJ21308                                                     |
| NCF1         | 0,30 | 0,000 | 4550  | 204961_s_at | neutrophil cytosolic factor 1 (47kDa, chronic granulomatous disease, autosomal 1) |
| MICAL2       | 0,30 | 0,000 | 11920 | 212473_s_at | flavoprotein oxidoreductase MICAL2                                                |
| ITGAM        | 0,31 | 0,000 | 5375  | 205786_s_at | integrin, alpha M (complement component receptor 3, alpha; CD11b (p170))          |
| PTPNS1       | 0,31 | 0,000 | 2487  | 202897_at   | protein tyrosine phosphatase, non-receptor type substrate 1                       |
| SELL         | 0,31 | 0,038 | 4152  | 204563_at   | selectin L (lymphocyte adhesion molecule 1)                                       |
| IL6ST        | 0,32 | 0,000 | 11643 | 212195_at   | interleukin 6 signal transducer (gp130, oncostatin M receptor)                    |
| HPSE         | 0,32 | 0,038 | 22774 | 222881_at   | heparanase                                                                        |
| RNASE6       | 0,33 | 0,000 | 13009 | 213566_at   | ribonuclease, RNase A family, k6                                                  |
| FLJ10357     | 0,33 | 0,000 | 22191 | 58780_s_at  | hypothetical protein FLJ10357                                                     |
| FLJ33069     | 0,34 | 0,000 | 38292 | 238429_at   | hypothetical protein FLJ33069                                                     |
| C6orf192     | 0,34 | 0,000 | 26171 | 226301_at   | chromosome 6 open reading frame 192                                               |
| NRGN         | 0,34 | 0,000 | 3670  | 204081_at   | neurogranin (protein kinase C substrate, RC3)                                     |
| ID1          | 0,35 | 0,000 | 8494  | 208937_s_at | inhibitor of DNA binding 1, dominant negative helix-loop-helix protein            |
| LMNB1        | 0,35 | 0,000 | 2865  | 203276_at   | lamin B1                                                                          |
| S100A9       | 0,36 | 0,000 | 3124  | 203535_at   | S100 calcium binding protein A9 (calgranulin B)                                   |
| CPNE2        | 0,36 | 0,000 | 25000 | 225129_at   | copine II                                                                         |
| IL1RN        | 0,36 | 0,000 | 12104 | 212657_s_at | interleukin 1 receptor antagonist                                                 |
| AHR          | 0,36 | 0,000 | 2410  | 202820_at   | aryl hydrocarbon receptor                                                         |
| GPX1         | 0,36 | 0,000 | 326   | 200736_s_at | glutathione peroxidase 1                                                          |
| FBN2         | 0,37 | 0,000 | 2774  | 203184_at   | fibrillin 2 (congenital contractural arachnodyly)                                 |
| PLP2         | 0,37 | 0,000 | 726   | 201136_at   | proteolipid protein 2 (colonic epithelium-enriched)                               |
| CD1D         | 0,37 | 0,000 | 5378  | 205789_at   | CD1D antigen, d polypeptide                                                       |
| KCTD12       | 0,37 | 0,000 | 11636 | 212188_at   | potassium channel tetramerisation domain containing 12                            |
| NCF4         | 0,37 | 0,000 | 4736  | 205147_x_at | neutrophil cytosolic factor 4, 40kDa                                              |
| TUBB1        | 0,37 | 0,025 | 30558 | 230690_at   | tubulin, beta 1                                                                   |
| C1QR1        | 0,38 | 0,000 | 2467  | 202877_s_at | complement component 1, q subcomponent, receptor 1                                |
| HOMER3       | 0,38 | 0,000 | 4236  | 204647_at   | homer homolog 3 (Drosophila)                                                      |
| S100A8       | 0,38 | 0,000 | 2508  | 202917_s_at | S100 calcium binding protein A8 (calgranulin A)                                   |
| KIAA1718     | 0,38 | 0,000 | 25013 | 225142_at   | KIAA1718 protein                                                                  |
| FLJ23153     | 0,38 | 0,000 | 25857 | 225987_at   | likely ortholog of mouse tumor necrosis-alpha-induced adipose-related protein     |
| VMP1         | 0,38 | 0,000 | 53742 | 1569003_at  | likely ortholog of rat vacuole membrane protein 1                                 |
| PPBP         | 0,38 | 0,025 | 13587 | 214146_s_at | pro-platelet basic protein (chemokine (C-X-C motif) ligand 7)                     |
| CPD          | 0,38 | 0,000 | 1530  | 201940_at   | carboxypeptidase D                                                                |
| GPR160       | 0,38 | 0,000 | 23314 | 223423_at   | G protein-coupled receptor 160                                                    |
| RAB27A       | 0,39 | 0,000 | 9070  | 209515_s_at | RAB27A, member RAS oncogene family                                                |
| DKFZp762O076 | 0,39 | 0,000 | 26208 | 226338_at   | hypothetical protein DKFZp762O076                                                 |

|              |      |       |       |             |                                                                            |
|--------------|------|-------|-------|-------------|----------------------------------------------------------------------------|
| FPR1         | 0,39 | 0,000 | 4708  | 205119_s_at | formyl peptide receptor 1                                                  |
| PADI4        | 0,39 | 0,026 | 19427 | 220001_at   | peptidyl arginine deiminase, type IV                                       |
| DSC2         | 0,39 | 0,000 | 26686 | 226817_at   | desmocollin 2                                                              |
| PHLDA2       | 0,40 | 0,000 | 9352  | 209803_s_at | pleckstrin homology-like domain, family A, member 2                        |
| GRN          | 0,40 | 0,000 | 10775 | 211284_s_at | granulin                                                                   |
| FLJ32798     | 0,40 | 0,000 | 38641 | 238778_at   | hypothetical protein FLJ32798                                              |
| EGFL5        | 0,40 | 0,000 | 12277 | 212830_at   | EGF-like-domain, multiple 5                                                |
| LOC91947     | 0,40 | 0,000 | 25154 | 225283_at   | hypothetical protein LOC91947                                              |
| FLJ23091     | 0,40 | 0,000 | 28817 | 228949_at   | putative NFkB activating protein 373                                       |
| FCGR1A       | 0,40 | 0,000 | 16382 | 216950_s_at | Fc fragment of IgG, high affinity Ia, receptor for (CD64)                  |
| JAG1         | 0,40 | 0,000 | 8655  | 209099_x_at | jagged 1 (Alagille syndrome)                                               |
| IL1B         | 0,41 | 0,029 | 4656  | 205067_at   | interleukin 1, beta                                                        |
| HEXB         | 0,41 | 0,000 | 1534  | 201944_at   | hexosaminidase B (beta polypeptide)                                        |
| FLJ10359     | 0,41 | 0,000 | 8490  | 208933_s_at | hypothetical protein FLJ10359                                              |
| MNDA         | 0,41 | 0,000 | 4548  | 204959_at   | myeloid cell nuclear differentiation antigen                               |
| PTAFR        | 0,41 | 0,000 | 5866  | 206278_at   | platelet-activating factor receptor                                        |
| APLP2        | 0,41 | 0,000 | 14312 | 214875_x_at | amyloid beta (A4) precursor-like protein 2                                 |
| SGK          | 0,41 | 0,000 | 1329  | 201739_at   | serum/glucocorticoid regulated kinase                                      |
| MGC39820     | 0,41 | 0,000 | 25810 | 225940_at   | hypothetical protein MGC39820                                              |
| HSPC195      | 0,42 | 0,000 | 24391 | 224516_s_at | hypothetical protein HSPC195 /// hypothetical protein HSPC195              |
| KIAA0146     | 0,42 | 0,025 | 28193 | 228325_at   | KIAA0146 protein                                                           |
| STAB1        | 0,42 | 0,000 | 21979 | 38487_at    | stabilin 1                                                                 |
| PRKAR2B      | 0,42 | 0,000 | 3269  | 203680_at   | protein kinase, cAMP-dependent, regulatory, type II, beta                  |
| C1orf24      | 0,42 | 0,038 | 17394 | 217967_s_at | chromosome 1 open reading frame 24                                         |
| C9orf19      | 0,43 | 0,000 | 25475 | 225604_s_at | chromosome 9 open reading frame 19                                         |
| IRF2BP2      | 0,43 | 0,000 | 24445 | 224572_s_at | interferon regulatory factor 2 binding protein 2                           |
| DKFZp434L142 | 0,43 | 0,000 | 19298 | 219872_at   | hypothetical protein DKFZp434L142                                          |
| BLVRB        | 0,43 | 0,000 | 1791  | 202201_at   | biliverdin reductase B (flavin reductase (NADPH))                          |
| GCA          | 0,43 | 0,000 | 3354  | 203765_at   | grancalcin, EF-hand calcium binding protein                                |
| TPCN1        | 0,43 | 0,000 | 17341 | 217914_at   | two pore segment channel 1                                                 |
| PLSCR1       | 0,43 | 0,000 | 41779 | 241916_at   | phospholipid scramblase 1                                                  |
| MAFF         | 0,44 | 0,000 | 21913 | 36711_at    | v-maf musculoaponeurotic fibrosarcoma oncogene homolog F (avian)           |
| TNFSF8       | 0,44 | 0,000 | 35598 | 235735_at   | tumor necrosis factor (ligand) superfamily, member 8                       |
| MGC26963     | 0,44 | 0,038 | 26907 | 227038_at   | hypothetical protein MGC26963                                              |
| CIDEB        | 0,44 | 0,000 | 20613 | 221188_s_at | cell death-inducing DFFA-like effector b                                   |
| APP          | 0,44 | 0,000 | 14390 | 214953_s_at | amyloid beta (A4) precursor protein (protease nexin-II, Alzheimer disease) |
| CKAP4        | 0,44 | 0,000 | 589   | 200999_s_at | cytoskeleton-associated protein 4                                          |
| PSTPIP1      | 0,45 | 0,000 | 10682 | 211178_s_at | proline-serine-threonine phosphatase interacting protein 1                 |
| FAM13A1      | 0,45 | 0,000 | 16479 | 217047_s_at | family with sequence similarity 13, member A1                              |
| C6orf56      | 0,45 | 0,000 | 42140 | 242277_at   | chromosome 6 open reading frame 56                                         |
| GRSP1        | 0,45 | 0,000 | 12501 | 213056_at   | GRP1-binding protein GRSP1                                                 |
| USP15        | 0,45 | 0,000 | 10207 | 210681_s_at | ubiquitin specific protease 15                                             |

|           |      |       |       |              |                                                                                             |
|-----------|------|-------|-------|--------------|---------------------------------------------------------------------------------------------|
| TM6SF1    | 0,45 | 0,025 | 19318 | 219892_at    | transmembrane 6 superfamily member 1                                                        |
| PTPNS1L3  | 0,45 | 0,027 | 49367 | 1559034_at   | protein tyrosine phosphatase, non-receptor type substrate 1-like 3                          |
| SLC38A2   | 0,45 | 0,000 | 22875 | 222982_x_at  | solute carrier family 38, member 2                                                          |
| SAP30     | 0,45 | 0,000 | 4489  | 204900_x_at  | sin3-associated polypeptide, 30kDa                                                          |
| NFE2      | 0,45 | 0,000 | 9478  | 209930_s_at  | nuclear factor (erythroid-derived 2), 45kDa                                                 |
| GRN       | 0,45 | 0,000 | 15475 | 216041_x_at  | granulin                                                                                    |
| TNFAIP3   | 0,46 | 0,000 | 2234  | 202644_s_at  | tumor necrosis factor, alpha-induced protein 3                                              |
| FLJ20186  | 0,46 | 0,000 | 25508 | 225637_at    | hypothetical protein FLJ20186                                                               |
| IL6R      | 0,46 | 0,000 | 26203 | 226333_at    | interleukin 6 receptor                                                                      |
| MAP2K6    | 0,46 | 0,000 | 5287  | 205698_s_at  | mitogen-activated protein kinase kinase 6                                                   |
| PPIF      | 0,46 | 0,000 | 1079  | 201489_at    | peptidylprolyl isomerase F (cyclophilin F)                                                  |
| LYZ       | 0,46 | 0,038 | 46379 | 1555745_a_at | lysozyme (renal amyloidosis)                                                                |
| MAML2     | 0,46 | 0,038 | 35320 | 235457_at    | mastermind-like 2 (Drosophila)                                                              |
| MYCL1     | 0,46 | 0,000 | 13499 | 214058_at    | v-myc myelocytomatosis viral oncogene homolog 1, lung carcinoma derived (avian)             |
| AQP9      | 0,46 | 0,000 | 5157  | 205568_at    | aquaporin 9                                                                                 |
| PGD       | 0,46 | 0,000 | 708   | 201118_at    | phosphogluconate dehydrogenase /// phosphogluconate dehydrogenase                           |
| SORL1     | 0,46 | 0,000 | 3098  | 203509_at    | sortilin-related receptor, L(DLR class) A repeats-containing                                |
| KIAA1598  | 0,46 | 0,000 | 21224 | 221802_s_at  | KIAA1598 protein                                                                            |
| LENG4     | 0,47 | 0,000 | 8735  | 209179_s_at  | leukocyte receptor cluster (LRC) member 4                                                   |
| RIT1      | 0,47 | 0,000 | 36087 | 236224_at    | Ras-like without CAAX 1                                                                     |
| ALDH2     | 0,47 | 0,000 | 1015  | 201425_at    | aldehyde dehydrogenase 2 family (mitochondrial)                                             |
| P4HB      | 0,47 | 0,000 | 52433 | 1564494_s_at | procollagen-proline, 2-oxoglutarate 4-dioxygenase (proline 4-hydroxylase), beta polypeptide |
| SMA5      | 0,47 | 0,000 | 14479 | 215043_s_at  | SMA5                                                                                        |
| IDH1      | 0,47 | 0,000 | 783   | 201193_at    | isocitrate dehydrogenase 1 (NADP+), soluble                                                 |
| OGFRL1    | 0,47 | 0,000 | 38332 | 238469_at    | opioid growth factor receptor-like 1                                                        |
| CCR1      | 0,47 | 0,032 | 4688  | 205099_s_at  | chemokine (C-C motif) receptor 1                                                            |
| HIF1A     | 0,47 | 0,000 | 579   | 200989_at    | hypoxia-inducible factor 1, alpha subunit (basic helix-loop-helix transcription factor)     |
| MSCP      | 0,48 | 0,000 | 26049 | 226179_at    | mitochondrial solute carrier protein                                                        |
| CGI-07    | 0,48 | 0,000 | 17463 | 218036_x_at  | CGI-07 protein                                                                              |
| TALDO1    | 0,48 | 0,000 | 1053  | 201463_s_at  | transaldolase 1                                                                             |
| TGIF      | 0,48 | 0,000 | 2902  | 203313_s_at  | TGFB-induced factor (TALE family homeobox)                                                  |
| BCL3      | 0,48 | 0,000 | 4497  | 204908_s_at  | B-cell CLL/lymphoma 3                                                                       |
| SGSH      | 0,48 | 0,000 | 21891 | 35626_at     | N-sulfoglucosamine sulfohydrolase (sulfamidase)                                             |
| LOC340061 | 0,48 | 0,000 | 24788 | 224916_at    | hypothetical protein LOC340061                                                              |
| ADM       | 0,48 | 0,000 | 2503  | 202912_at    | adrenomedullin                                                                              |
| FLJ21868  | 0,48 | 0,000 | 18074 | 218648_at    | hypothetical protein FLJ21868                                                               |
| EVI2A     | 0,49 | 0,000 | 4363  | 204774_at    | ecotropic viral integration site 2A                                                         |
| BNIP3L    | 0,49 | 0,000 | 20903 | 221478_at    | BCL2/adenovirus E1B 19kDa interacting protein 3-like                                        |
| AMICA     | 0,49 | 0,000 | 27962 | 228094_at    | adhesion molecule AMICA                                                                     |
| LOC285550 | 0,50 | 0,000 | 27335 | 227466_at    | hypothetical protein LOC285550                                                              |
| MOB4A     | 0,50 | 0,000 | 25867 | 225997_at    | Mob4A protein                                                                               |
| WSX1      | 0,50 | 0,000 | 21484 | 222062_at    | class I cytokine receptor                                                                   |

|      |      |       |      |           |                                                               |
|------|------|-------|------|-----------|---------------------------------------------------------------|
| DPYD | 0,50 | 0,000 | 4235 | 204646_at | dihydropyrimidine dehydrogenase                               |
| PPGB | 0,50 | 0,000 | 251  | 200661_at | protective protein for beta-galactosidase (galactosialidosis) |

**Unknown transcribed sequences (n=23)**

| GeneSymbol | ratio | p-value | ProbeSetN | ProbeSetID   | GeneTitle                                                                                         |
|------------|-------|---------|-----------|--------------|---------------------------------------------------------------------------------------------------|
| ---        | 0,50  | 0,000   | 29802     | 229934_at    | Homo sapiens transcribed sequences                                                                |
| ---        | 0,49  | 0,000   | 14939     | 215504_x_at  | Homo sapiens clone 25061 mRNA sequence                                                            |
| ---        | 0,48  | 0,027   | 39374     | 239511_s_at  | Homo sapiens transcribed sequence with weak similarity to protein sp:P39194 (H.sapiens)           |
| ---        | 0,48  | 0,000   | 38952     | 239089_at    | Homo sapiens transcribed sequences                                                                |
| ---        | 0,47  | 0,000   | 26300     | 226430_at    | Homo sapiens cDNA: FLJ21778 fis, clone HEP00201                                                   |
| ---        | 0,47  | 0,000   | 53521     | 1568609_s_at | Homo sapiens, clone IMAGE:6061696, mRNA                                                           |
| ---        | 0,47  | 0,000   | 41301     | 241438_at    | Homo sapiens transcribed sequences                                                                |
| ---        | 0,45  | 0,000   | 38376     | 238513_at    | ---                                                                                               |
| ---        | 0,44  | 0,000   | 14507     | 215071_s_at  | ---                                                                                               |
| ---        | 0,44  | 0,000   | 13372     | 213931_at    | Homo sapiens transcribed sequence with strong similarity to protein pir:A40227 (H.sapiens)        |
| ---        | 0,44  | 0,027   | 34891     | 235028_at    | Homo sapiens cDNA FLJ46440 fis, clone THYMU3016022                                                |
| ---        | 0,42  | 0,000   | 49871     | 1559910_at   | Homo sapiens mRNA full length insert cDNA clone EUROIMAGE 151282                                  |
| ---        | 0,42  | 0,000   | 29096     | 229228_at    | Homo sapiens cDNA FLJ32589 fis, clone SPLEN2000443.                                               |
| ---        | 0,42  | 0,000   | 12259     | 212812_at    | Homo sapiens cDNA: FLJ22642 fis, clone HSI06970                                                   |
| ---        | 0,41  | 0,000   | 34935     | 235072_s_at  | Homo sapiens transcribed sequences                                                                |
| ---        | 0,41  | 0,000   | 28244     | 228376_at    | Homo sapiens, clone IMAGE:4812754, mRNA                                                           |
| ---        | 0,40  | 0,000   | 48825     | 1558011_at   | Homo sapiens transcribed sequence with moderate similarity to protein ref:NP_055163.1 (H.sapiens) |
| ---        | 0,39  | 0,000   | 35661     | 235798_at    | Homo sapiens transcribed sequence with weak similarity to protein ref:NP_055301.1 (H.sapiens)     |
| ---        | 0,37  | 0,000   | 32099     | 232231_at    | Homo sapiens mRNA; cDNA DKFZp761J1112 (from clone DKFZp761J1112)                                  |
| ---        | 0,34  | 0,000   | 49952     | 1560034_a_at | Homo sapiens mRNA; cDNA DKFZp313E1515 (from clone DKFZp313E1515)                                  |
| ---        | 0,33  | 0,000   | 11079     | 211612_s_at  | ---                                                                                               |
| ---        | 0,32  | 0,000   | 4449      | 204860_s_at  | Homo sapiens transcribed sequence with strong similarity to protein sp:Q13075 (H.sapiens)         |
| ---        | 0,27  | 0,000   | 13525     | 214084_x_at  | Homo sapiens similar to Neutrophil cytosolic factor 1 (LOC378112), mRNA                           |
