# Supplementary material for: Transcriptional profiling reveals developmental relationship and distinct biological functions of CD16+ and CD16- monocyte subsets
Source: PubMed Central journal article supplement (PMC2741492; doi:10.1186/1471-2164-10-403), 2009-08-27

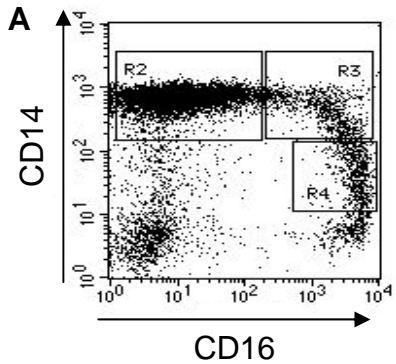

- Control
- CD14<sup>high</sup>CD16<sup>neg</sup> Mo (R2)
- CD14<sup>high</sup>CD16<sup>+</sup> Mo (R3)
- CD14<sup>low</sup>CD16<sup>+</sup> Mo (R4)

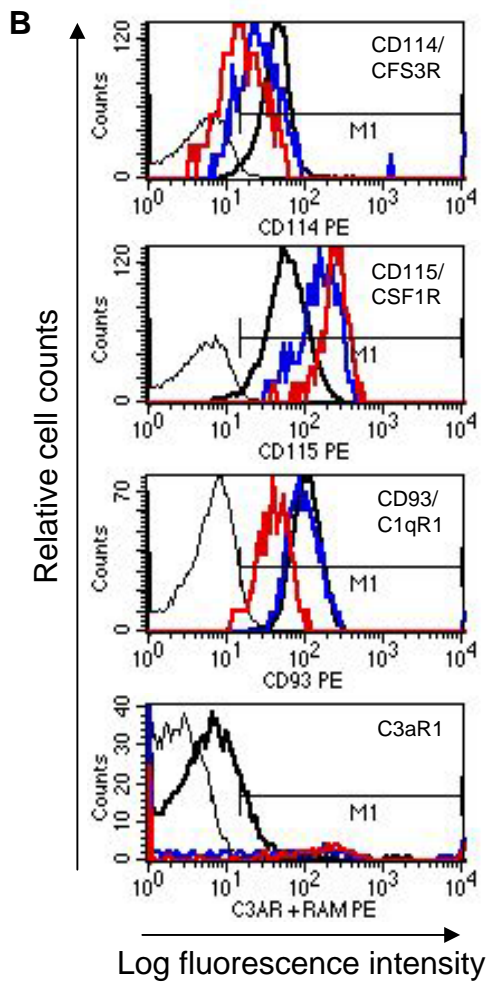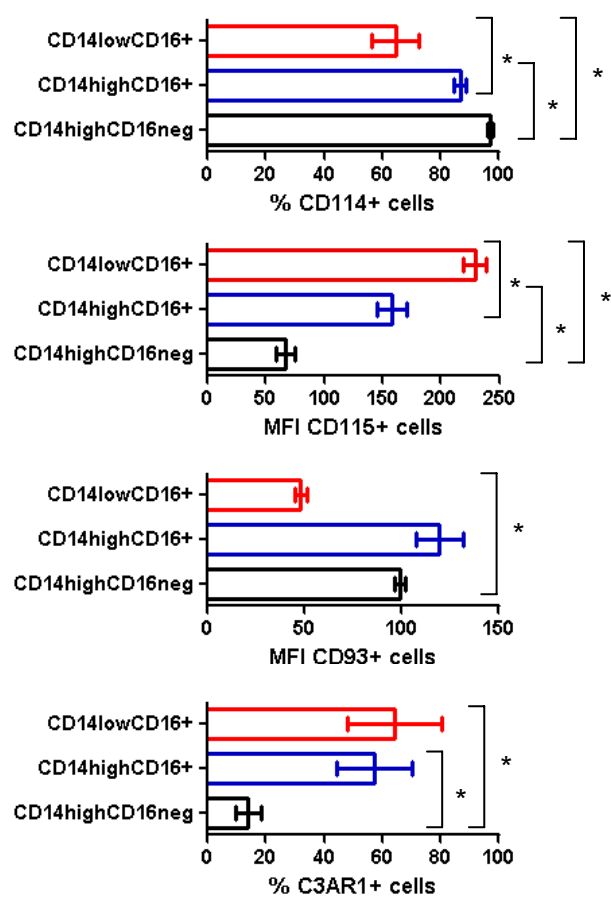

Supplement: 1471-2164-10-403-S3.pdf [file 1471-2164-10-403-S3.pdf]
